# Supplementary material for: High-Density Lipoprotein Particles and Their Relationship to Posttransplantation Diabetes Mellitus in Renal Transplant Recipients
Source: PubMed Central journal article supplement (PMC7175217; doi:10.3390/biom10030481), 2020-03-21
Supplement: biomolecules-10-00481-s001.pdf [file biomolecules-10-00481-s001.pdf]

## Supplementary Materials

**Table S1.** Spearman correlations between HDL particles, LDL-P, and TRL-P

| Variables  | Large HDL | Medium HDL | Small HDL | LDL-P     | TRL-P     |
|------------|-----------|------------|-----------|-----------|-----------|
| Large HDL  | -         | 0.089*     | -0.236*** | -0.225*** | -0.225*** |
| Medium HDL | -         | -          | -0.392*** | -0.043    | -0.058    |
| Small HDL  | -         | -          | -         | 0.145**   | 0.136**   |
| LDL-P      | -         | -          | -         | -         | 0.395***  |
| TRL-P      | -         | -          | -         | -         | -         |

\*P<0.05; \*\*P<0.01; \*\*\*P<0.001

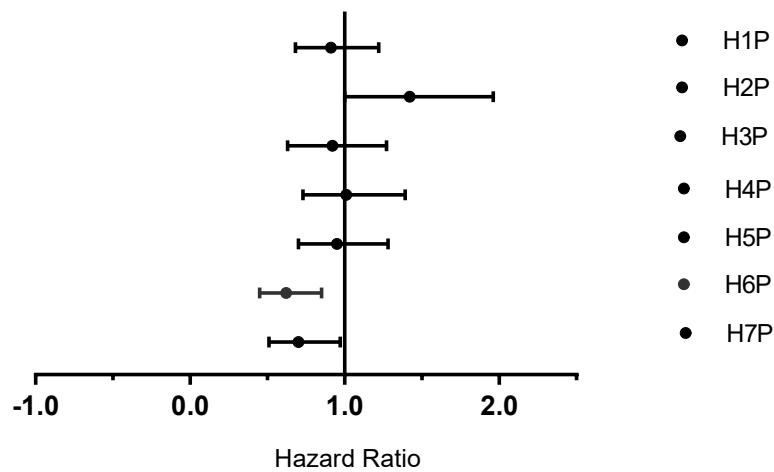

**Figure S1.** Association between Plasma HDL subspecies and risk of PTDM. Hazard ratio (95% CIs) per 1SD increase in each HDL subspecies derived from Cox proportional hazards model for PTDM events (n=39 total events)

**Table S2.** Association between large HDL subspecies and risk of PTDM in 351 RTRs

| Tertiles              | 1          | 2                 | 3                 |                  |                |
|-----------------------|------------|-------------------|-------------------|------------------|----------------|
| H6P $\mu\text{mol/L}$ | >1.2       | 0.4-1.1           | <0.4              | Per 1SD Log H6P  | <i>P</i> value |
| Cases                 | 4          | 14                | 21                | 39               |                |
| Crude analysis        | 1.00 (ref) | 4.04 (1.33-12.29) | 6.15 (2.11-17.9)  | 0.62 (0.45-0.85) | 0.003          |
| Model 1               | 1.00 (ref) | 4.77 (1.22-11.62) | 5.90 (1.98-17.57) | 0.64 (0.47-0.89) | 0.007          |
| Model 2               | 1.00 (ref) | 3.26 (1.03-10.28) | 5.69 (1.89-17.11) | 0.64 (0.45-0.90) | 0.010          |
| Model 3               | 1.00 (ref) | 3.80 (1.22-11.79) | 6.61 (2.20-19.84) | 0.60 (0.43-0.83) | 0.002          |
| Model 4               | 1.00 (ref) | 3.66 (1.16-11.50) | 6.12 (2.03-18.44) | 0.63 (0.45-0.88) | 0.006          |
| Model 5               | 1.00 (ref) | 3.44 (1.11-10.65) | 5.06 (1.66-15.41) | 0.71 (0.50-0.99) | 0.047          |
| Model 6               | 1.00 (ref) | 3.61 (1.15-11.28) | 5.39 (1.77-16.37) | 0.68 (0.49-0.95) | 0.024          |
| H7P $\mu\text{mol/L}$ | >0.4       | 0.2-0.4           | <0.2              | Per 1SD Log H7P  | <i>P</i> value |
| Cases                 | 5          | 20                | 14                | 39               |                |
| Crude analysis        | 1.00 (ref) | 3.53 (1.32-9.41)  | 3.65 (1.31-10.14) | 0.70 (0.51-0.97) | 0.034          |
| Model 1               | 1.00 (ref) | 3.14 (1.17-8.46)  | 3.18 (1.13-8.99)  | 0.75 (0.53-1.06) | 0.10           |
| Model 2               | 1.00 (ref) | 2.89 (1.06-7.85)  | 2.88 (1.00-8.26)  | 0.76 (0.54-1.07) | 0.11           |
| Model 3               | 1.00 (ref) | 3.48 (1.29-9.41)  | 3.07 (1.08-8.72)  | 0.77 (0.55-1.08) | 0.12           |
| Model 4               | 1.00 (ref) | 3.09 (1.14-8.35)  | 2.65 (0.92-7.60)  | 0.82 (0.58-1.15) | 0.25           |
| Model 5               | 1.00 (ref) | 2.24 (0.82-6.10)  | 2.13 (0.74-6.13)  | 0.93 (0.65-1.33) | 0.69           |
| Model 6               | 1.00 (ref) | 3.19 (1.16-8.78)  | 2.39 (0.80-7.10)  | 0.90 (0.64-1.29) | 0.58           |

HRs (95% CIs) were derived from Cox proportional hazard models. Multivariable model 1 was adjusted for age, sex, and BMI. Model 2 adjusted for model 1 variables and alcohol consumption, smoking, and physical activity; Model 3 adjusted for model 1 variables and treatment (lipid-lowering medication, anti-hypertensive medication, prednisolone dose, calcineurin inhibitors, and proliferation inhibitors); Model 4 adjusted for model 1 variables and eGFR, urinary albumin excretion, CMV infection, time after transplantation; Model 5 adjusted for model 1 variables and HbA1c; Model 6 adjusted for model 1 variables and systolic blood pressure, fasting blood glucose and triglycerides.
